# Supplementary material
Source: PubMed Central journal article supplement (PMC11216870)
Supplement: NIHMS1978533-supplement-1.pdf [file NIHMS1978533-supplement-1.pdf]

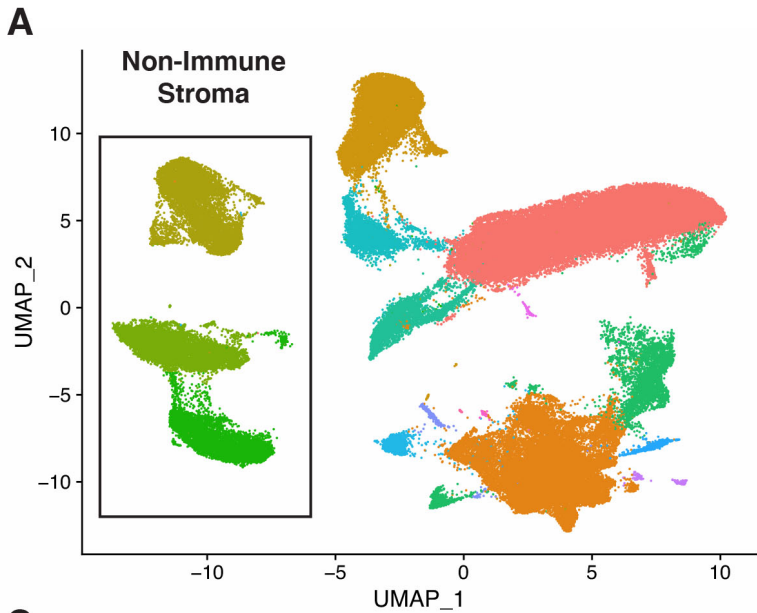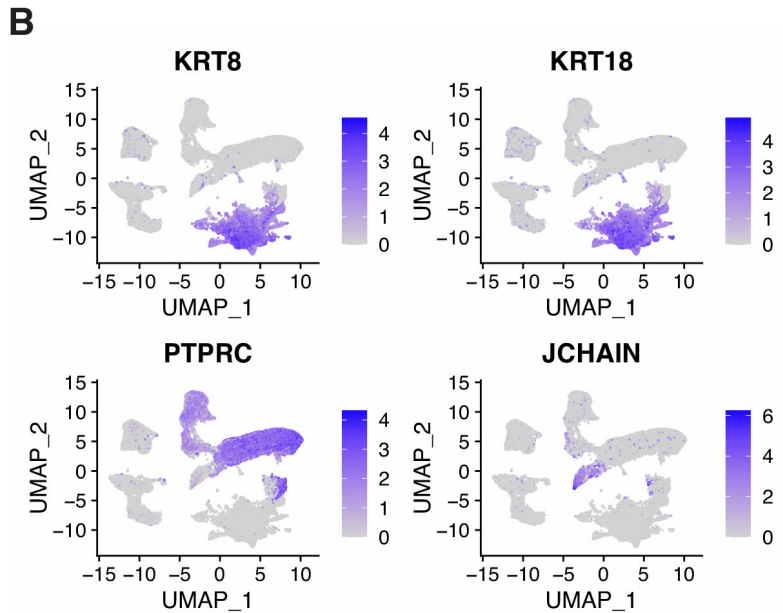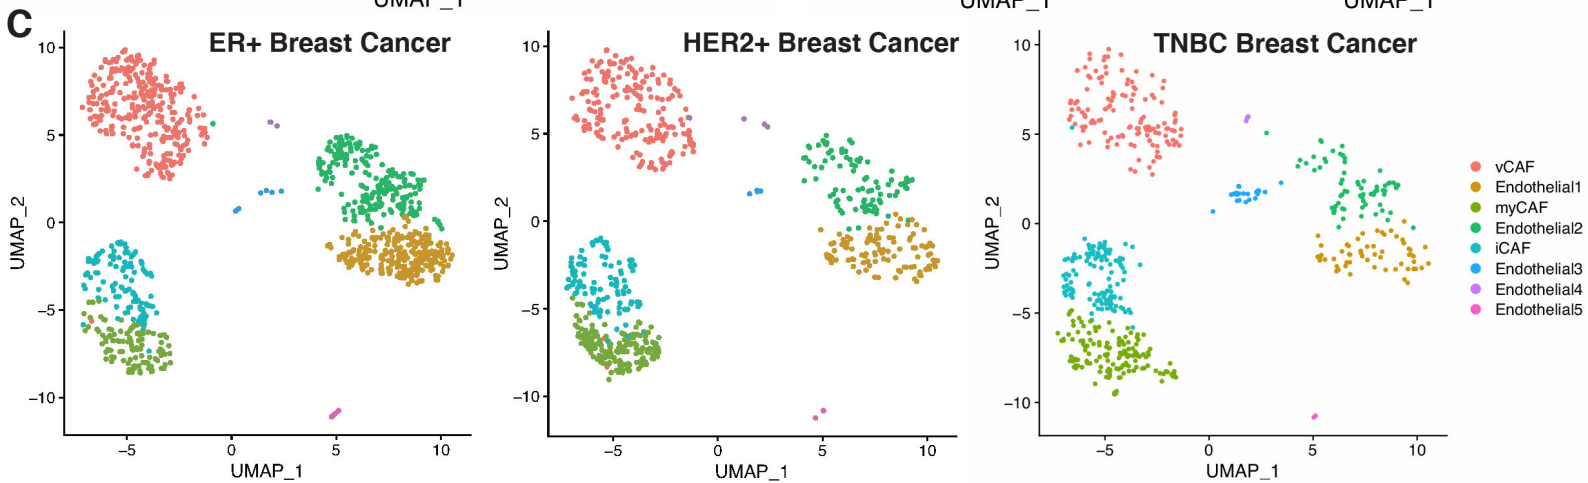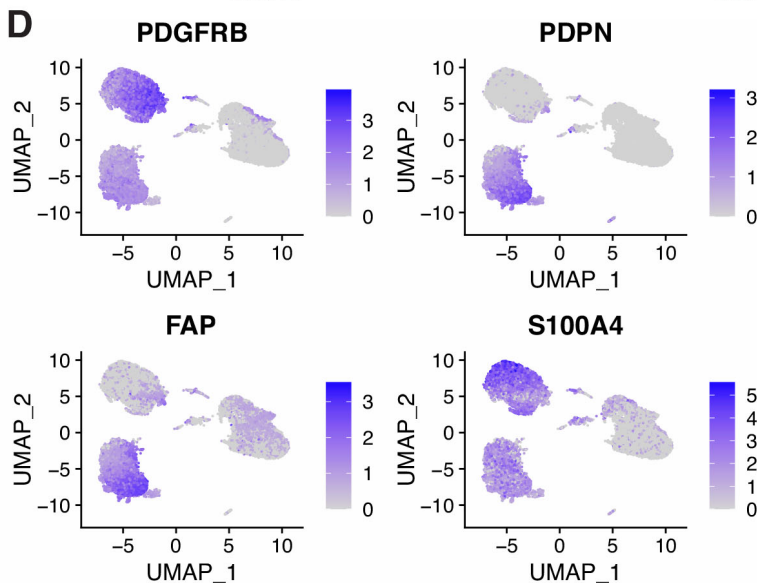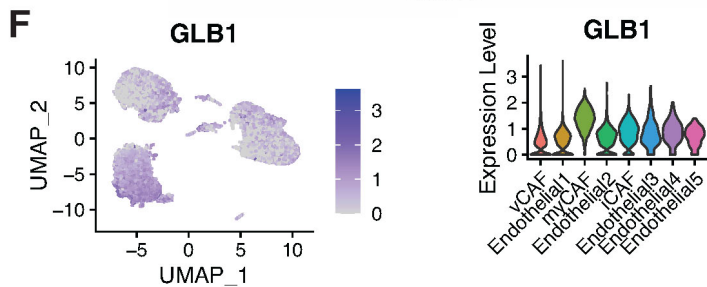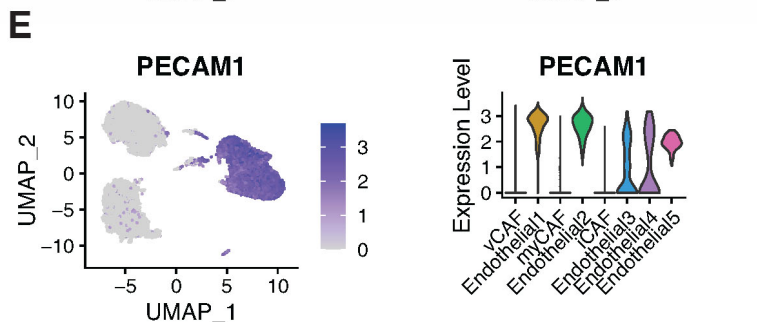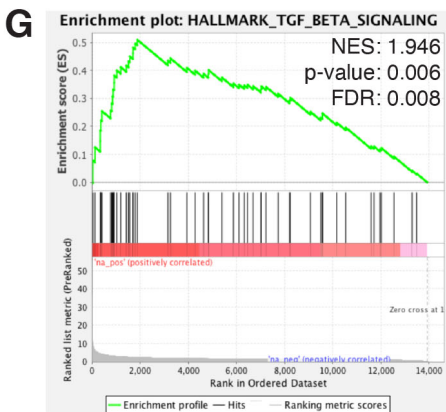

**Supplemental Figure 1. Human breast cancer consists of complex cell types. (A)**

Uniform Manifold Approximation and Projection (UMAP) of total cells from 26 breast cancer cases. Non-immune stromal cells within the box. **(B)** Feature plots of total cells from 26 breast cancer cases highlighting *KRT8* and *KRT18* positive tumor cells, *PTPRC* (CD45) positive immune cells and *JCHAIN* positive B cells. **(C)** UMAP of total non-immune stromal cells from each subtype of the 26 breast cancer cases that were shown in **A** and **B**. **(D)** Feature plots showing the expressions of typical cancer associated fibroblasts markers (*PDGFRB*, *PDPN*, *FAP*, and *S100A4*) in non-immune stromal cells from breast cancer cases. **(E)** Feature plot and violin plot for the expression of *PECAM1* (CD31) in selected stromal cell types. **(F)** Feature plot and violin plot for the expression of *GLB1* in selected stromal cell types. **(G)** Gene set enrichment analyses comparing myCAFs to the other CAF populations showed enrichment of TGF- $\beta$  signaling. Normalized Enrichment Score (NES), p-value, and False Discovery Rate (FDR) are shown in the plot.
