# Supplementary material
Source: PubMed Central journal article supplement (PMC11216870)
Supplement: NIHMS1978533-supplement-4.pdf [file NIHMS1978533-supplement-4.pdf]

**A**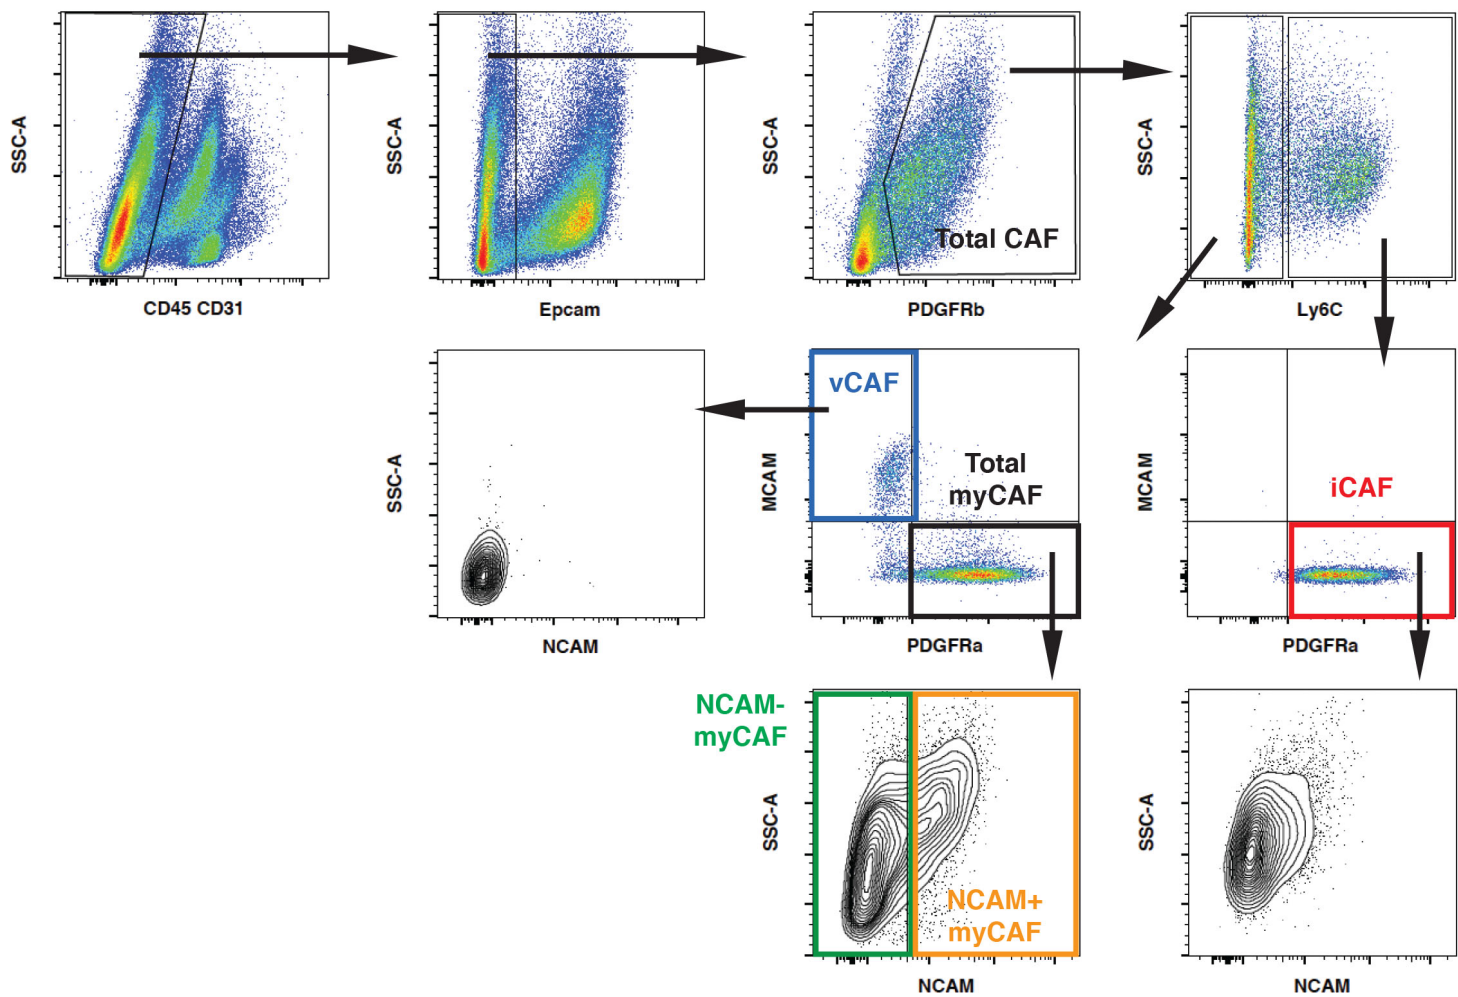**B**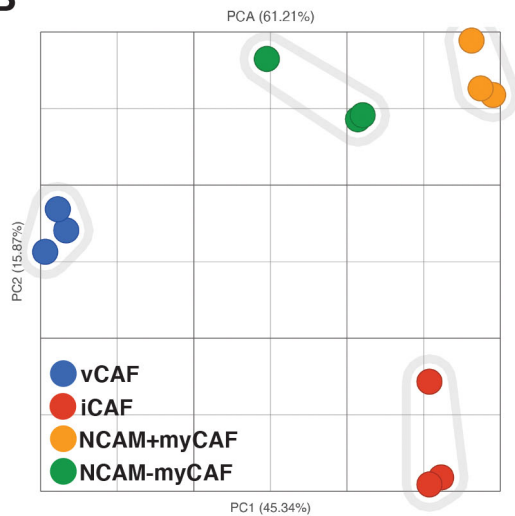**C**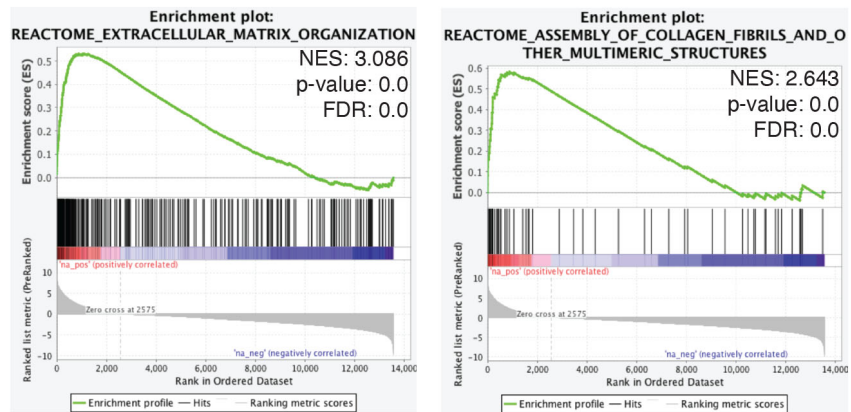

**Supplemental Figure 4. Gating strategies and characterization of MMTV-PyMT CAFs. (A)** CAF flow cytometry gating strategy used for analyses and sorting of CAFs. **(B)** Principle component analyses (PCA) of CAF populations sorted from 3 10-week-old MMTV-PyMT mice. **(C)** Gene set enrichment analyses of NCAM+ myCAF<sub>s</sub> compared to the other 3 CAF populations showed enrichment of ECM organization (left) and collagen assembly (right). Normalized Enrichment Score (NES), p-value, and False Discovery Rate (FDR) are shown in each plot.
