# Supplementary material
Source: PubMed Central journal article supplement (PMC11216870)
Supplement: NIHMS1978533-supplement-6.pdf [file NIHMS1978533-supplement-6.pdf]

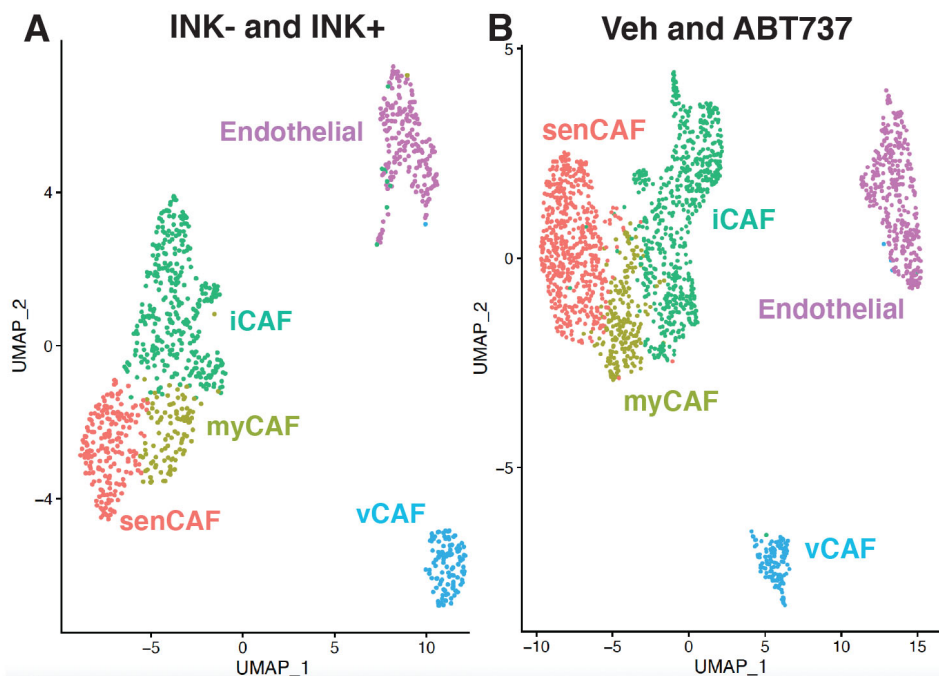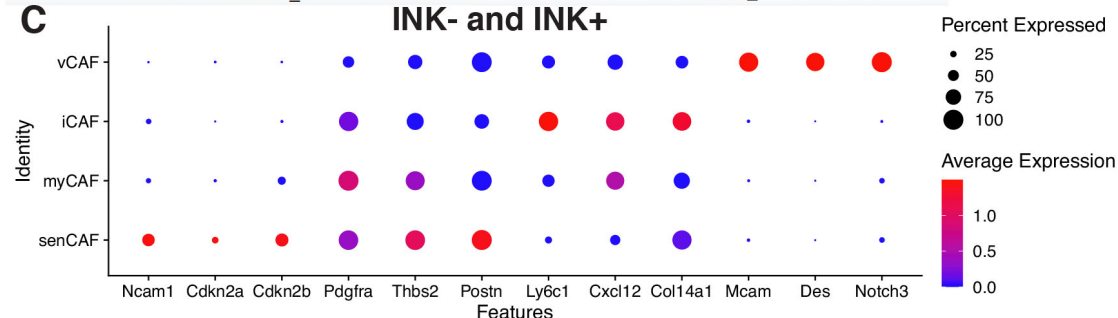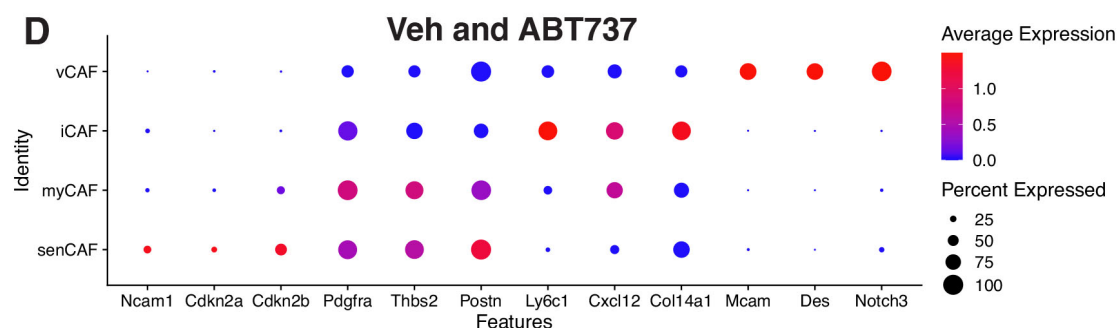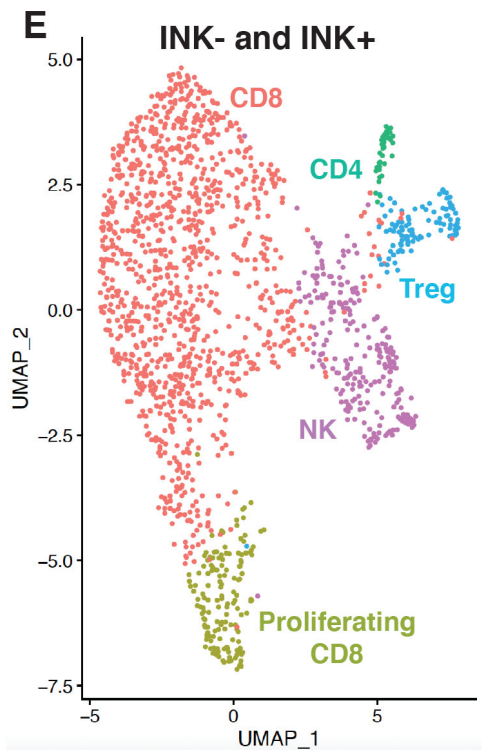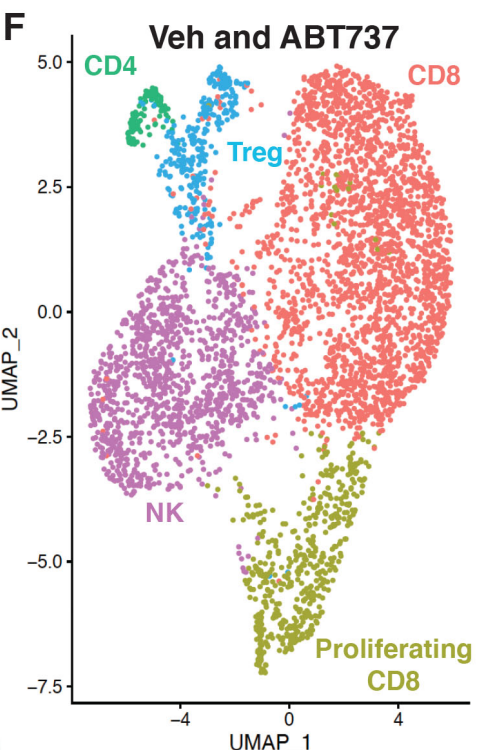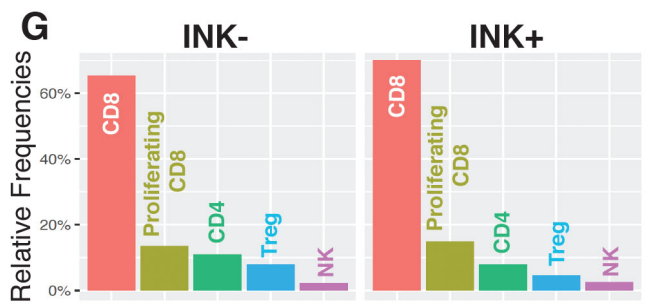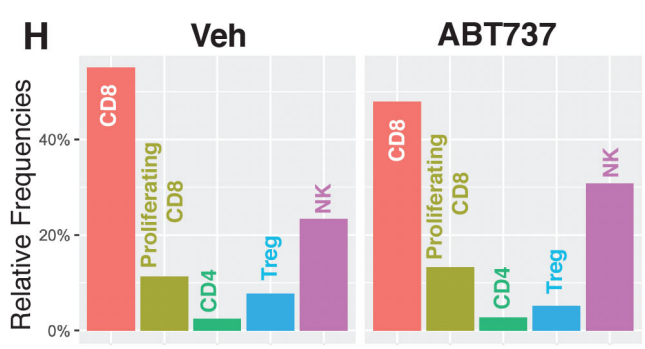

Suppl. Figure 6

**Supplemental Figure 6. Depletion of senescent CAFs alters tumor immunity. (A)**

Uniform Manifold Approximation and Projection (UMAP) of endothelial cells and CAFs from 7-week-old MMTV-PyMT INK<sup>-</sup> and INK<sup>+</sup> mice (n=2 for each group, datasets of both genotypes were merged with identity for clustering and downstream analysis). **(B)**

Uniform Manifold Approximation and Projection (UMAP) of endothelial cells and CAFs from 7-week-old MMTV-PyMT mice treated with Vehicle (Veh) and ABT737 (n=2 for each group, datasets of both treatments were merged with identity for clustering and downstream analysis). **(C)** Dot plot displaying gene expression parameters including

percentage of cells (size of black dots) and expression levels (colored scale bar) of a designated gene within a specific population (y-axis) in CAFs identified from MMTV-PyMT INK<sup>-</sup> and INK<sup>+</sup> mice tumor samples (merged). Features include senescence markers *Cdkn2a* (p16) and *Cdkn2b* (p15), signature CAF markers as utilized in CAF flow cytometry panel **Fig. S4A**, and most differentially expressed genes of each CAF subpopulation (senescent CAF (senCAF): *Ncam1*; senCAF and myofibroblastic CAF (myCAF) in general: *Pdgfra*, *Thbs2*, and *Postn*; inflammatory CAF (iCAF): *Ly6c1*, *Cxcl12*, and *Col14a1*; vascular CAF (vCAF: *Mcam*, *Des*, *Notch3*)). **(D)** Dot plot displaying gene

expression parameters including percentage of cells (size of black dots) and expression levels (colored scale bar) of a designated gene within a specific population (y-axis) in CAFs identified from vehicle (Veh) and ABT737-treated MMTV-PyMT mice (merged).

Features include signature CAF markers as described in **C**. **(E)** Uniform Manifold Approximation and Projection (UMAP) of immune cells from the same MMTV-PyMT INK<sup>-</sup>

and INK<sup>+</sup> mice shown in **A**. **(F)** Uniform Manifold Approximation and Projection (UMAP) of immune cells from the same MMTV-PyMT mice treated with Vehicle (Veh) or ABT737

shown in **B**. **(G)** Quantification of immune populations from INK- versus INK+ mice shown in **E**. **(H)** Quantification of immune populations from MMTV-PyMT mice treated with Vehicle (Veh) or ABT737 shown in **F**.
