# Supplementary material
Source: PubMed Central journal article supplement (PMC11216870)
Supplement: NIHMS1978533-supplement-11.pdf [file NIHMS1978533-supplement-11.pdf]

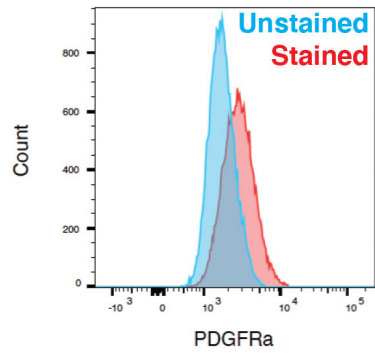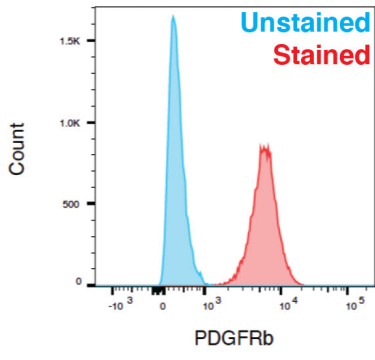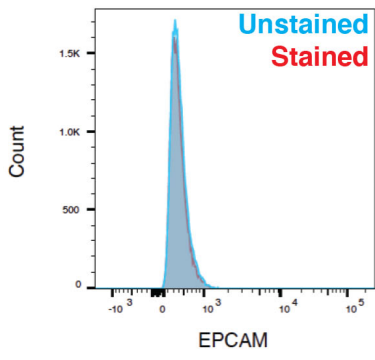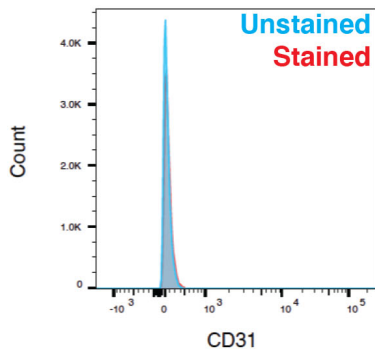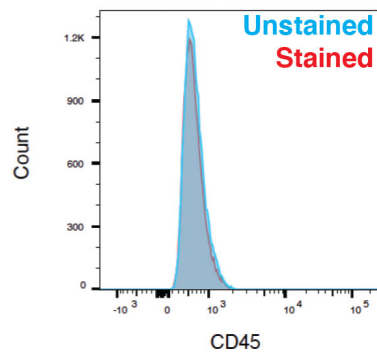

**Supplemental Figure 11. Flow cytometry validation of mouse mammary fibroblasts' (MMFs) identity.** Established MMFs were subject to staining and flow cytometry (blue: unstained MMF; red: stained MMF) to validate that they are positive for fibroblast markers PDGFR $\alpha$  and PDGFR $\beta$  (top row) and negative for epithelial cell marker EPCAM, endothelial cell marker CD31, and immune cell marker CD45.
